# Supplementary material for: Batch and packed bed techniques for adsorptive aqueous phase removal of selected phenoxyacetic acid herbicide using sugar industry waste ash
Source: publisher site journal article supplement (doi:10.1515/ijcre-2020-0084), 2020-11-04
Supplement: Supplementary file 1 [file j_ijcre-2020-0084_suppl.docx]

**SUPPLEMENTARY MATERIALS**

**Table S1:** Packed bed parameters for adsorption of MCPA on BFA

| **C0**  **(mg/L)** | **Q**  **(mL/min)** | **Z**  **(cm)** | **tb**  **(min)** | **ts**  **(min)** | **Ve**  **(mL)** | **qb**  **(mg/g)** | **qs**  **(mg/g)** | **MTZ**  **(cm)** | **FBU** | **Removal %** |
| --- | --- | --- | --- | --- | --- | --- | --- | --- | --- | --- |
| 50 | 1 | 8.5 | 139.93 | 1050.41 | 1050.41 | 1.34 | 2.86 | 4.52 | 0.47 | 39.56 |
| 100 | 1 | 8.5 | 107.15 | 945.46 | 945.46 | 1.84 | 4.10 | 4.69 | 0.45 | 32.56 |
| 150 | 1 | 8.5 | 66.88 | 696.27 | 696.27 | 2.13 | 4.92 | 4.82 | 0.43 | 24.07 |
| 100 | 1 | 8.5 | 107.15 | 945.46 | 945.46 | 1.84 | 4.10 | 4.69 | 0.45 | 32.56 |
| 100 | 2 | 8.5 | 48.96 | 540.36 | 1080.72 | 1.64 | 3.79 | 4.83 | 0.43 | 30.87 |
| 100 | 3 | 8.5 | 27.5 | 284.733 | 854.20 | 1.38 | 3.53 | 5.17 | 0.39 | 26.31 |
| 100 | 1 | 6.0 | 58.03 | 831.50 | 831.50 | 1.42 | 3.95 | 3.84 | 0.36 | 28.46 |
| 100 | 1 | 8.5 | 107.15 | 945.46 | 945.46 | 1.84 | 4.10 | 4.69 | 0.45 | 32.56 |
| 100 | 1 | 11.5 | 142.15 | 1212.63 | 1212.63 | 2.00 | 4.86 | 6.77 | 0.41 | 40.74 |

**Table S2** Parameters of packed bed models for adsorption of MCPA on BFA

| **Experimental condition** | | | **Bohart–Adams model** | | | | | **Wolborska model** | | | | | **Thomas model** | | | | |
| --- | --- | --- | --- | --- | --- | --- | --- | --- | --- | --- | --- | --- | --- | --- | --- | --- | --- |
| **C0**  **mg/L** | **Q**  **mL/min** | **Z**  **cm** | **KAB**  **L/(mg min)** | **N0**  **mg/L** | **tbpred**  **min** | **Є** | **MPSD** | **β**  **min-1** | **QW**  **mg/g** | **tbpred**  **min** | **Є** | **MPSD** | **KT**  **L/(mg min)** | **q0**  **mg/g** | **tbpred**  **min** | **Є** | **MPSD** |
| 50 | 1 | 8.5 | 2.60 × 10-4 | 1656.59 | 141.11 | -0.84 | 14.47 | 0.454 | 7.80 | 141.11 | -0.84 | 14.47 | 2.64 × 10-4 | 3.09 | 139.52 | 0.29 | 18.88 |
| 100 | 1 | 8.5 | 2.10 ×10-4 | 2161.57 | 97.97 | 8.57 | 22.21 | 0.431 | 10.18 | 97.97 | 8.57 | 22.21 | 1.81 × 10-4 | 4.24 | 89.71 | 16.28 | 24.17 |
| 150 | 1 | 8.5 | 1.93 × 10-4 | 2260.14 | 65.32 | 2.33 | 24.79 | 0.437 | 10.64 | 65.32 | 2.33 | 24.79 | 1.60 × 10-4 | 4.48 | 57.66 | 13.79 | 22.82 |
| 100 | 1 | 8.5 | 2.10 × 10-4 | 2161.57 | 97.97 | 8.57 | 22.21 | 0.431 | 10.18 | 97.97 | 8.57 | 22.21 | 1.81 × 10-4 | 4.24 | 89.71 | 16.28 | 24.17 |
| 100 | 2 | 8.5 | 5.10 × 10-4 | 1899.34 | 46.07 | 5.91 | 36.37 | 0.969 | 8.94 | 46.07 | 5.91 | 36.37 | 3.73 × 10-4 | 3.98 | 40.18 | 17.93 | 43.67 |
| 100 | 3 | 8.5 | 7.30 × 10-4 | 1786.31 | 25.65 | 6.73 | 37.08 | 1.304 | 8.41 | 25.65 | 6.73 | 37.08 | 6.01 × 10-4 | 3.45 | 20.81 | 24.32 | 38.21 |
| 100 | 1 | 6.0 | 4.80 × 10-4 | 1640.86 | 63.28 | -9.05 | 35.13 | 0.788 | 7.73 | 63.28 | -9.05 | 35.13 | 2.93 × 10-4 | 3.91 | 41.41 | 28.65 | 59.86 |
| 100 | 1 | 8.5 | 2.10 × 10-4 | 2161.57 | 97.97 | 8.57 | 22.21 | 0.454 | 10.18 | 97.97 | 8.57 | 22.21 | 1.81 × 10-4 | 4.24 | 89.71 | 16.28 | 24.17 |
| 100 | 1 | 11.5 | 1.60 × 10-4 | 2247.50 | 148.15 | -4.22 | 24.02 | 0.360 | 10.58 | 148.15 | -4.22 | 24.02 | 1.30 × 10-4 | 4.76 | 163.91 | -15.31 | 32.97 |
| **Experimental condition** | | | **Clark model** | | | | | **Yoon–Nelson model** | | | | | **Deactivation Kinetic model** | | | | |
| **C0**  **mg/L** | **Q**  **mL/min** | **Z**  **cm** | **A** | **r**  **min-1** | **tb pred**  **min** | **Є** | **MPSD** | **KYN**  **min-1** | **t0.5 expt**  **min** | **t0.5 pred**  **min** | **Є** | **MPSD** | **k0**  **mL/(g min)** | **kd**  **min-1** | **tb pred**  **min** | **Є** | **MPSD** |
| 50 | 1 | 8.5 | 124.34 | 0.015 | 141.67 | -1.24 | 18.52 | 0.013 | 277.5 | 297.20 | -7.10 | 21.52 | 0.563 | 0.011 | 135.24 | 3.35 | 16.48 |
| 100 | 1 | 8.5 | 107.88 | 0.021 | 94.43 | 11.87 | 29.81 | 0.023 | 170.3 | 176.52 | -3.65 | 39.25 | 0.606 | 0.019 | 101.14 | 5.61 | 16.69 |
| 150 | 1 | 8.5 | 83.10 | 0.029 | 59.38 | 11.21 | 26.46 | 0.029 | 114.23 | 129.72 | -13.56 | 28.99 | 0.552 | 0.024 | 61.92 | 7.42 | 20.94 |
| 100 | 1 | 8.5 | 107.88 | 0.021 | 94.43 | 11.87 | 29.81 | 0.023 | 170.3 | 176.52 | -3.65 | 39.25 | 0.606 | 0.019 | 101.14 | 5.61 | 16.69 |
| 100 | 2 | 8.5 | 66.69 | 0.039 | 38.51 | 21.33 | 50.84 | 0.046 | 74.78 | 89.50 | -19.68 | 33.69 | 1.534 | 0.043 | 47.67 | 2.64 | 20.69 |
| 100 | 3 | 8.5 | 22.58 | 0.045 | 9.31 | 66.14 | 33.83 | 0.071 | 46.5 | 53.38 | -14.80 | 27.03 | 1.762 | 0.068 | 26.37 | 4.11 | 18.95 |
| 100 | 1 | 6.0 | 32.01 | 0.026 | 29.54 | 49.09 | 19.24 | 0.043 | 99.52 | 114.65 | -15.20 | 39.17 | 0.871 | 0.026 | 52.83 | 8.96 | 17.73 |
| 100 | 1 | 8.5 | 107.88 | 0.021 | 94.43 | 11.87 | 29.81 | 0.023 | 170.3 | 176.52 | -3.65 | 39.25 | 0.606 | 0.019 | 101.14 | 5.61 | 16.69 |
| 100 | 1 | 11.5 | 117.10 | 0.015 | 137.67 | 3.15 | 44.33 | 0.016 | 254.43 | 280.69 | -10.32 | 22.57 | 0.403 | 0.012 | 136.40 | 4.04 | 21.32 |

**
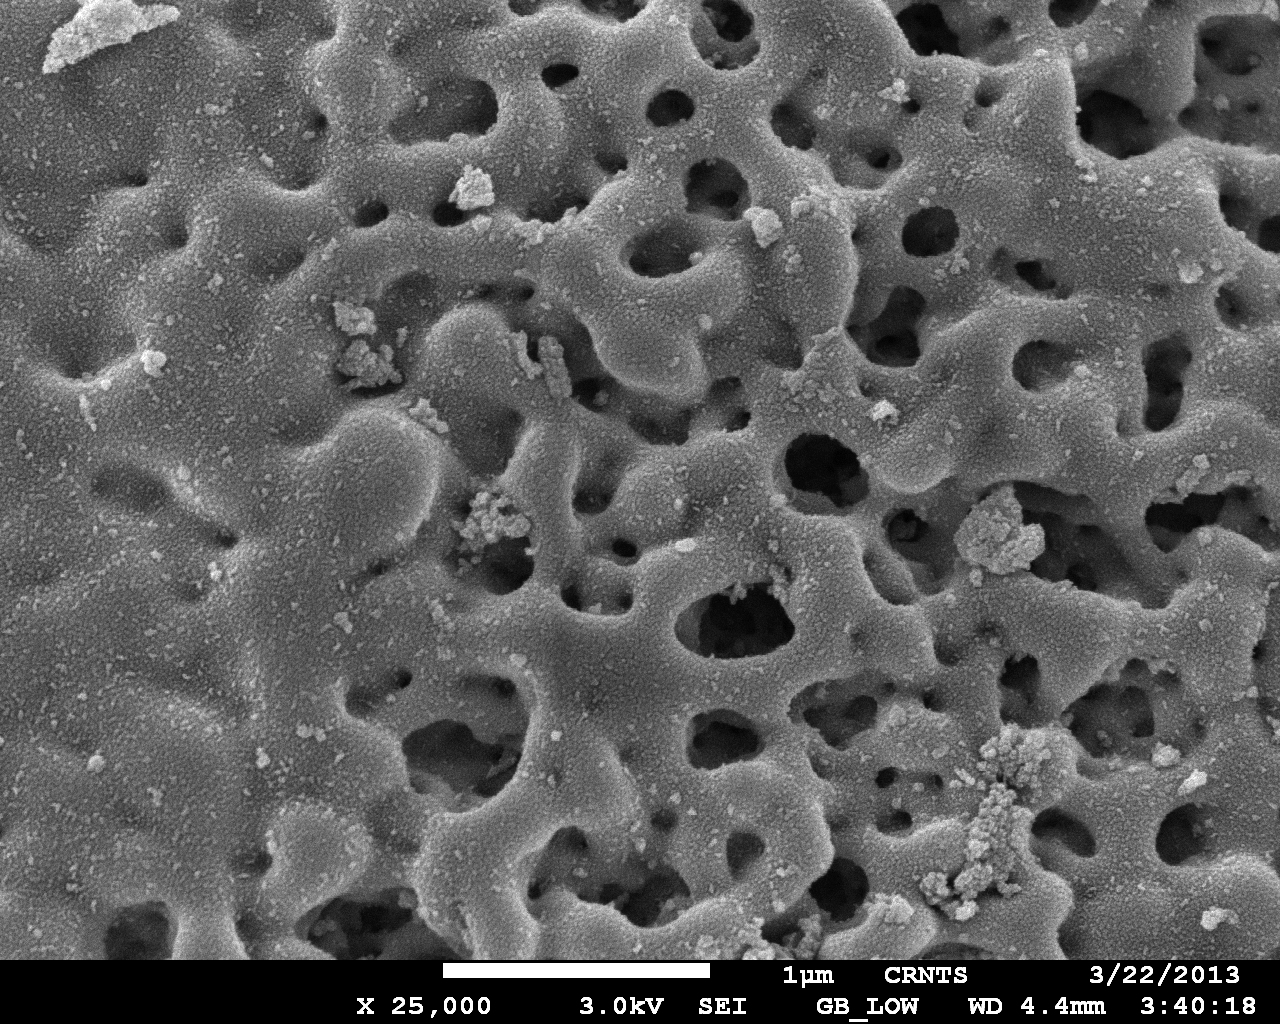
**

**Figure S1.** Scanning electron micrograph (SEM) of BFA





**Figure S2.** Effect of BFA dosage on removal of MCPA at 303 K





**Figure S3.** Effect of solution pH on the removal of MCPA (100 mg/L, 720 min, 303 K)





**Figure S4**. Effect of influent concentration on packed bed adsorption of MCPA on BFA





**Figure S5.** Effect of flow rate on packed bed adsorption of MCPA on BFA

*

*

**Figure S6.** Effect of bed height on packed bed adsorption of MCPA on BFA
